# Supplementary material for: Improvement of Sourdough and Bread Qualities by Fermented Water of Asian Pears and Assam Tea Leaves with Co-Cultures of Lactiplantibacillus plantarum and Saccharomyces cerevisiae
Source: Foods. 2022 Jul 12;11(14):2071. doi: 10.3390/foods11142071 (PMC9318377; doi:10.3390/foods11142071)
Supplement: Supplementary file 1 [file foods-11-02071-s001.zip › foods-1801138-supplementary.pdf]

Supplementary materials

# The Improvement of Sourdough and Bread Qualities by Fermented Water from Asian Pears and Assam Tea Leaves with Co-cultures of *Lactiplantibacillus plantarum* and *Saccharomyces cerevisiae*

Ramita Supasil, Uthaiwan Suttisansanee, Chalot Santivarangkna, Nattapol Tangsuphoom, Chanakan Khemthong, Chaowanee Chupeerach and Nattira On-nom \*

Food and Nutrition Academic and Research Cluster, Institute of Nutrition, Mahidol University, Salaya, Phut-tamonthon, Nakhon Pathom 73170, Thailand; ramita.sup1@gmail.com (R.S.); uthaiwan.sut@mahidol.ac.th (U.S.); chalot.san@mahidol.ac.th (C.S.); mailto:nattapol.tng@mahidol.ac.th (N.T.); chanakan.khe@mahidol.ac.th (C.K.); chaowanee.chu@mahidol.ac.th (C.C.)

\* Correspondence: nattira.onn@mahidol.ac.th (N.O.); Tel.: +66-(0)-2800-2380 (ext.426)

**Table S1.** Growth of *L. plantarum* and *S. cerevisiae* in common sourdough and fermented water sourdough throughout fermentation.

| Fermentation time<br>(h) | <i>L. plantarum</i>      |                              | <i>S. cerevisiae</i>      |                              |
|--------------------------|--------------------------|------------------------------|---------------------------|------------------------------|
|                          | Common<br>sourdough      | Fermented water<br>sourdough | Common<br>sourdough       | Fermented water<br>sourdough |
| 0                        | 7.28 ± 0.05 <sup>b</sup> | 7.27 ± 0.10 <sup>c</sup>     | 5.75 ± 0.02 <sup>c</sup>  | 5.72 ± 0.04 <sup>c</sup>     |
| 1                        | 7.22 ± 0.04 <sup>b</sup> | 7.83 ± 0.10 <sup>b,*</sup>   | 5.95 ± 0.06 <sup>a</sup>  | 6.11 ± 0.07 <sup>b,*</sup>   |
| 2                        | 7.39 ± 0.08 <sup>b</sup> | 7.87 ± 0.08 <sup>b,*</sup>   | 5.81 ± 0.06 <sup>bc</sup> | 6.15 ± 0.02 <sup>b,*</sup>   |
| 3                        | 7.39 ± 0.14 <sup>b</sup> | 7.82 ± 0.10 <sup>b,*</sup>   | 5.84 ± 0.02 <sup>b</sup>  | 6.15 ± 0.12 <sup>b,*</sup>   |
| 4                        | 7.94 ± 0.27 <sup>a</sup> | 8.14 ± 0.07 <sup>a</sup>     | 6.00 ± 0.04 <sup>a</sup>  | 6.36 ± 0.03 <sup>a,*</sup>   |

Results were expressed as mean values of triplicate determinations ( $n=3$ ). Different uppercase and lowercase letters denote significantly different viable cell count of microorganisms in common sourdough and fermented water sourdough, respectively at different fermentation times using one-way ANOVA, followed by Duncan's multiple comparison test at  $p < 0.05$ , while \* denotes significantly different viable cell count of microorganisms between common sourdough and fermented water sourdough detected at the same fermentation time using Student's unpaired  $t$ -test at  $p < 0.05$ .

**Table S2.** A trend in pH and height of common sourdough and fermented water sourdough over fermentation time periods.

| Fermentation time<br>(h) | pH                         |                              | Height (inch)             |                              |
|--------------------------|----------------------------|------------------------------|---------------------------|------------------------------|
|                          | Common<br>sourdough        | Fermented water<br>sourdough | Common<br>sourdough       | Fermented water<br>sourdough |
| 0                        | 5.98 ± 0.01 <sup>a,*</sup> | 5.51 ± 0.02 <sup>a</sup>     | 1.00 ± 0.00 <sup>d</sup>  | 1.00 ± 0.00 <sup>d</sup>     |
| 1                        | 5.36 ± 0.15 <sup>b,*</sup> | 4.48 ± 0.05 <sup>b</sup>     | 1.25 ± 0.25 <sup>cd</sup> | 1.50 ± 0.87 <sup>cd</sup>    |
| 2                        | 4.94 ± 0.02 <sup>c,*</sup> | 4.46 ± 0.04 <sup>b</sup>     | 1.58 ± 0.38 <sup>c</sup>  | 2.17 ± 0.58 <sup>bc</sup>    |
| 3                        | 4.80 ± 0.05 <sup>d,*</sup> | 4.21 ± 0.03 <sup>c</sup>     | 2.00 ± 0.50 <sup>b</sup>  | 2.83 ± 0.76 <sup>ab</sup>    |
| 4                        | 4.45 ± 0.02 <sup>e,*</sup> | 4.14 ± 0.03 <sup>d</sup>     | 2.50 ± 0.50 <sup>a</sup>  | 3.33 ± 0.76 <sup>a</sup>     |

Results were expressed as mean values of triplicate determinations ( $n=3$ ). Different uppercase and lowercase letters denote significantly different values (pH or height) at  $p < 0.05$  in common sourdough and fermented water sourdough, respectively, fermented at different time periods using one-way ANOVA, followed by Duncan's multiple comparison test, while \* denotes significantly different values (pH or height) at  $p < 0.05$  between common sourdough and fermented water sourdough fermented at the same time period using Student's unpaired  $t$ -test.
